# Supplementary material for: Stable polymer brushes with effectively varied grafting density synthesized from highly crosslinked random copolymer thin films
Source: Royal Society of Chemistry journal article supplement (doi:10.1039/c8ra04480e), 2018-01-01
Supplement: c8ra04480e1.pdf [file c8ra04480e1.pdf]

Electronic Supplementary Material (ESI)

# **Stable Polymer Brushes with Effectively Varied Grafting Density Synthesized from Highly Crosslinked Random Copolymer Thin Films**

Hyungoo Kang,<sup>a,§</sup> Sol An,<sup>a,§</sup> Woo Jung Lee,<sup>b</sup> Ga Ryang Kang,<sup>c</sup> Sangwon Kim,<sup>d</sup> Su-Mi Hur,<sup>c,\*</sup>  
Keewook Paeng,<sup>b,\*</sup> and Myungwoong Kim<sup>a,\*</sup>

<sup>a</sup> Department of Chemistry, Inha University, Incheon 22212, Korea. E-mail: mkim233@inha.ac.kr

<sup>b</sup> Department of Chemistry, Sungkyunkwan University, Suwon 16419, Korea. E-mail:  
paeng@skku.edu

<sup>c</sup> School of Polymer Science and Engineering, Chonnam National University, Gwangju 61186, Korea.  
E-mail: shur@chonnam.ac.kr

<sup>d</sup> Department of Polymer Science and Engineering, Inha University, Incheon 22212, Korea.

§ These authors contributed equally to this work.

## **Table of contents**

1. Supporting Figure S1-S7

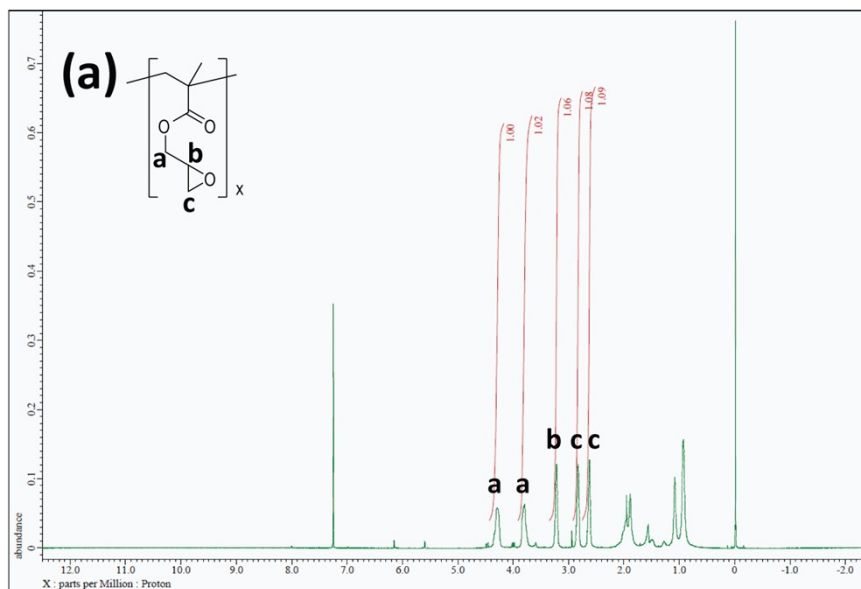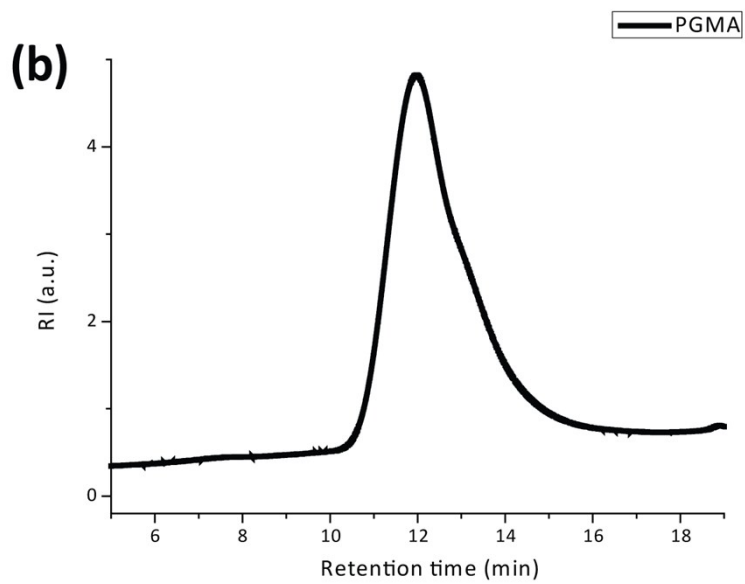

**Figure S1.** (a)  $^1\text{H}$ -NMR spectrum and (b) SEC chromatogram of PGMA

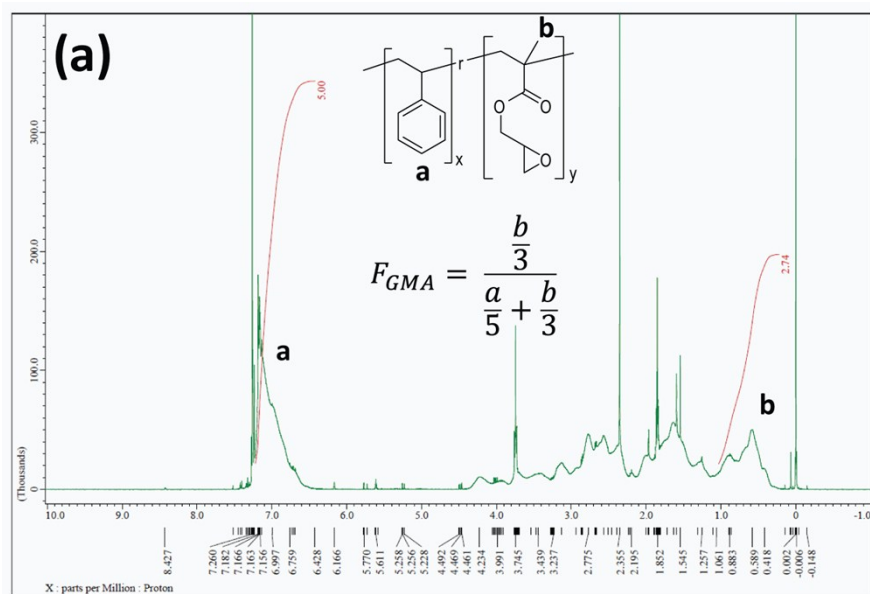

— PSG0.48

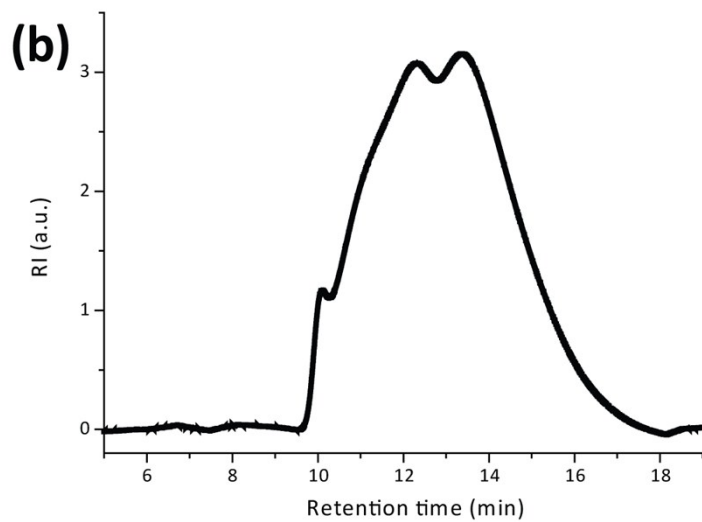

**Figure S2.** (a)  $^1\text{H-NMR}$  spectrum and (b) SEC chromatogram of PSG0.48

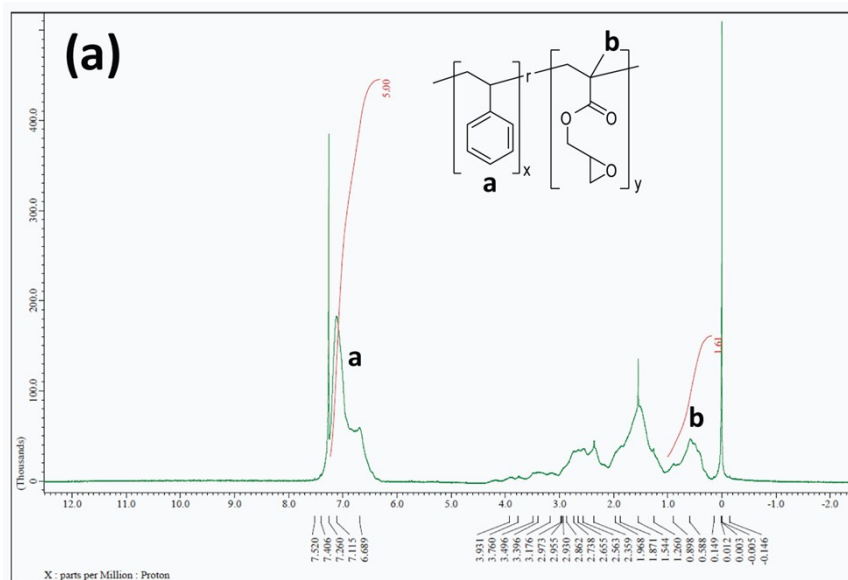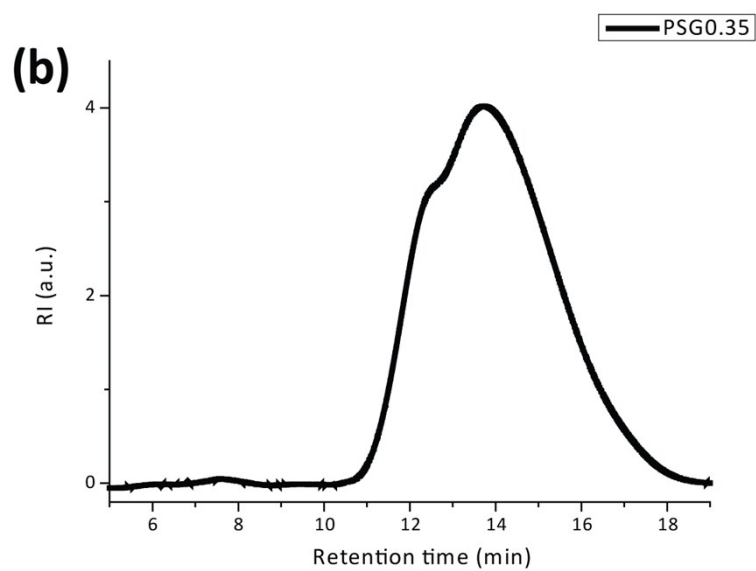

**Figure S3.** (a)  $^1\text{H}$ -NMR spectrum and (b) SEC chromatogram of PSG0.35

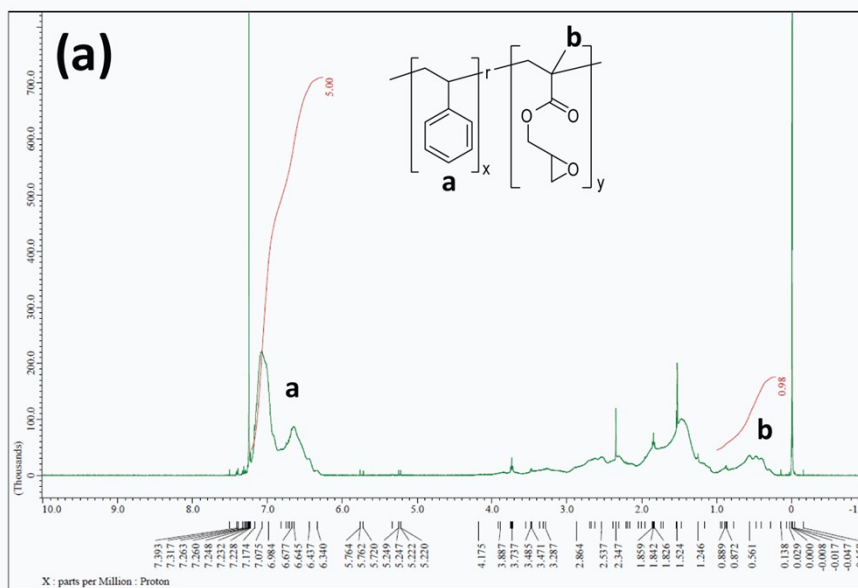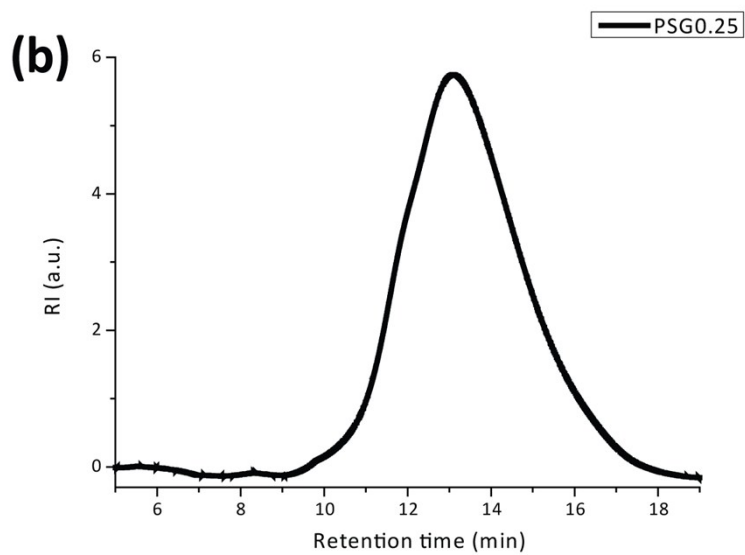

**Figure S4.** (a)  $^1\text{H-NMR}$  spectrum and (b) SEC chromatogram of PSG0.25

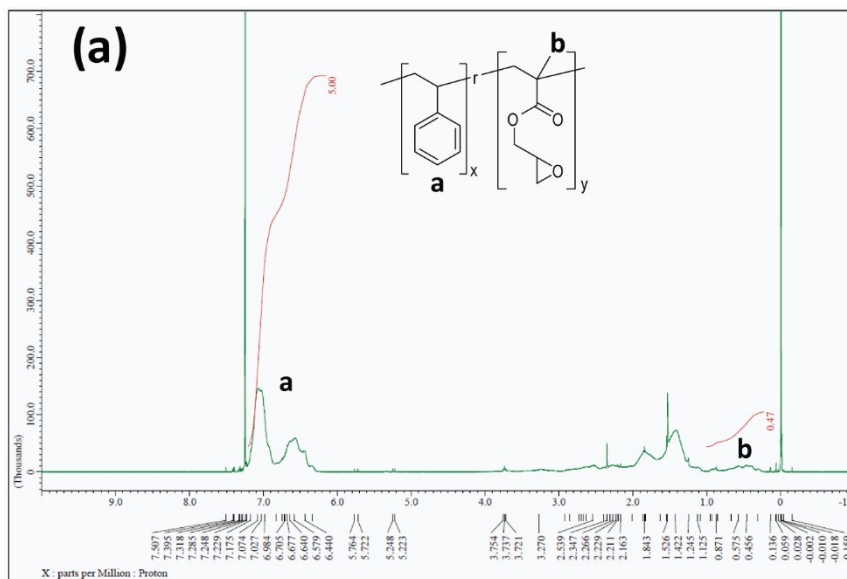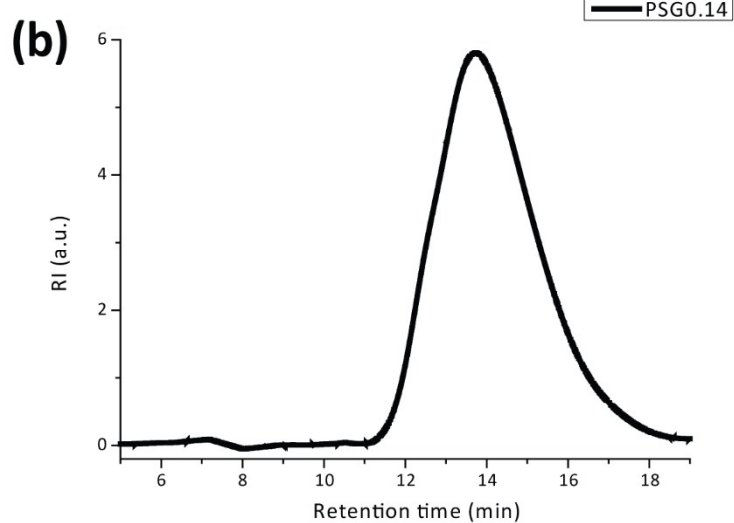

**Figure S5.** (a)  $^1\text{H-NMR}$  spectrum and (b) SEC chromatogram of PSG0.14

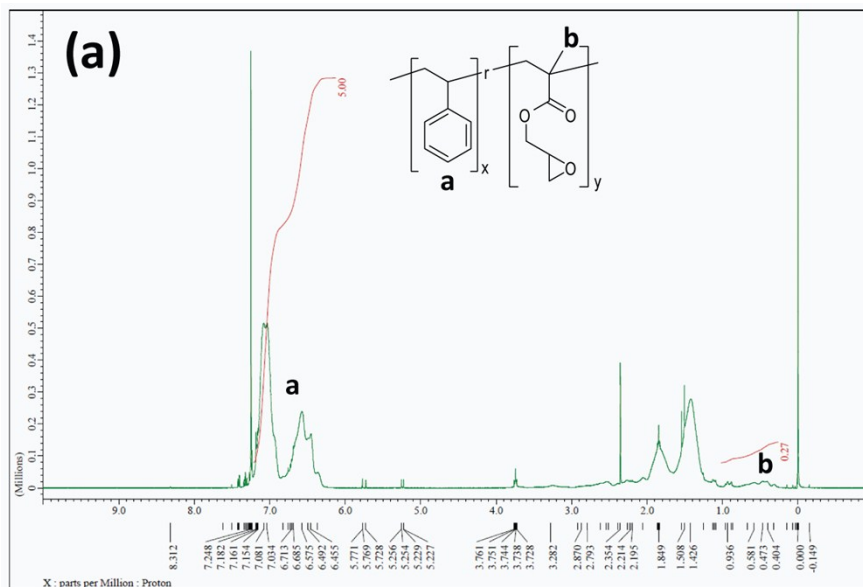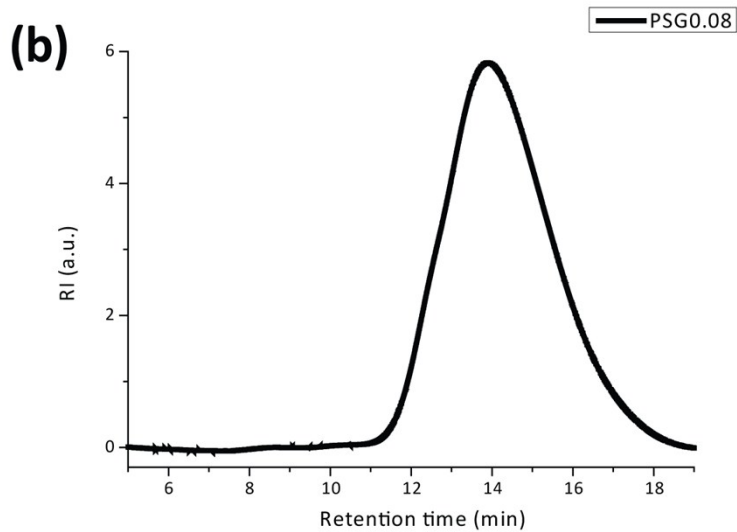

**Figure S6.** (a)  $^1\text{H-NMR}$  spectrum and (b) SEC chromatogram of PSG0.08

## 1. Ester of GMA and BiBB: acid-catalyzed hydrolysis

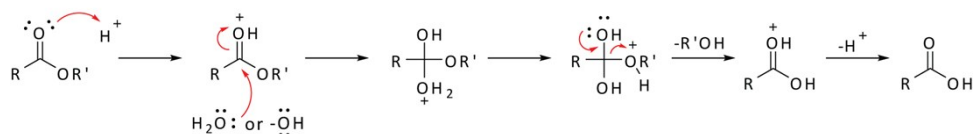

## 2. Ether of crosslinked P(S-r-GMA): protonation and $S_N2$ reaction

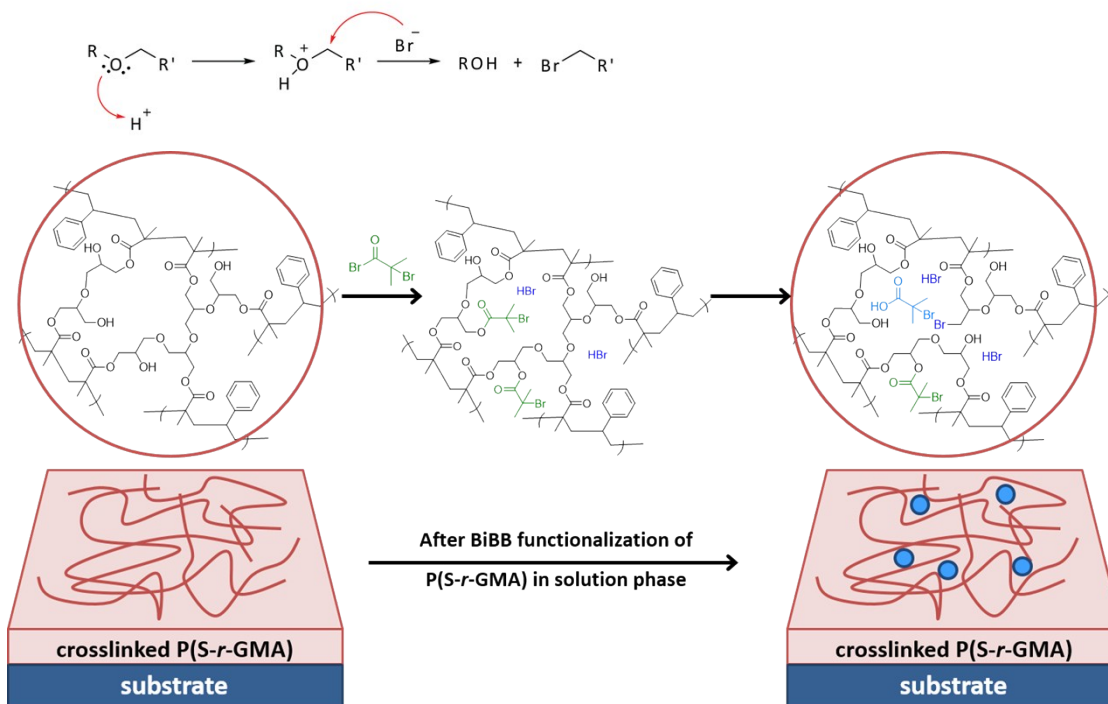

**Figure S7.** The possible mechanisms of hydrolysis and cleavage of ester group and ether group in solution phase functionalization.



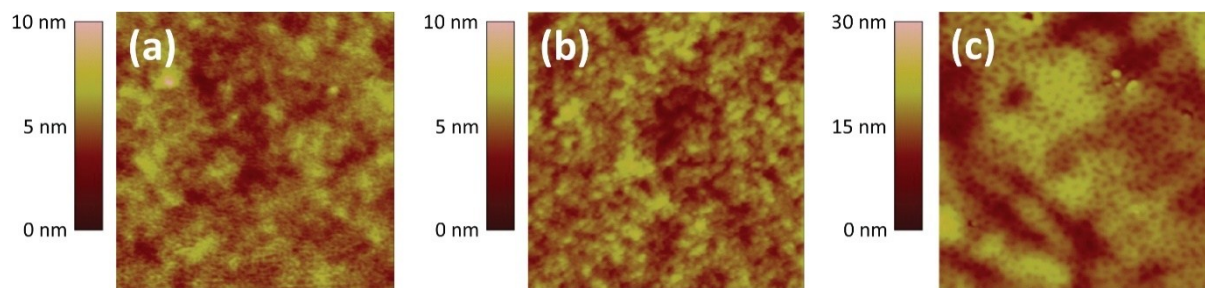

**Figure S8.** AFM height images with color bar of as-prepared P(S-*b*-MMA) block copolymer brushes of (a) **27K-40K**, (b) **46-56K**, and (c) **101K-137K**. The size of images is  $1.5 \mu\text{m} \times 1.5 \mu\text{m}$ .
